# Supplementary material
Source: HighWire-hosted journal article supplement (https://erj.ersjournals.com/highwire/filestream/113457/field_highwire_adjunct_files/0/online_data_supplement.pdf)
Supplement: online_data_supplement.pdf [file online_data_supplement.pdf]

## **ONLINE DATA SUPPLEMENT**

### **SHARED *PSEUDOMONAS AERUGINOSA* GENOTYPES ARE COMMON IN AUSTRALIAN CYSTIC FIBROSIS CENTRES.**

Timothy J Kidd, Kay A Ramsay, Honghua Hu, Guy B Marks, Claire E Wainwright, Peter T Bye, Mark R Elkins, Philip J Robinson, Barbara R Rose, John W Wilson, Keith Grimwood, Scott C Bell, and the ACPinCF Investigator Group.

**Table S1 Study population, number of patients and isolates genotyped, and sampling time frame**

**Table S2 Comparison of microbiological data with enterobacterial repetitive intergenic consensus (ERIC)-PCR genotype.**

**Table S3 Comparison of enterobacterial repetitive intergenic consensus (ERIC)-PCR genotype with multilocus sequence type (MLST) sequence (ST)**

**Table S4 Comparison of multilocus sequence type (MLST) sequence type (ST) with enterobacterial repetitive intergenic consensus (ERIC-PCR) genotype**

**References**

**Table S1 Study population, number of patients and isolates genotyped and sampling time frame**

| State/CF Centre*† | Centre type‡ | Patient population | Patients recruited | <i>P. aeruginosa</i> positive patients genotyped (isolates genotyped) § | Sampling timeframe (mm/yyyy) |
|-------------------|--------------|--------------------|--------------------|-------------------------------------------------------------------------|------------------------------|
| NSW/01            | P            | 149                | 75                 | 18 (54)                                                                 | 11/2007 - 03/2009            |
| NSW/02            | A            | 237                | 160                | 113 (331)                                                               | 12/2007 - 07/2009            |
| NSW/03            | P            | 259                | 233                | 61 (178)                                                                | 11/2007 - 11/2009            |
| NSW/04            | A            | 57                 | 21                 | 20 (56)                                                                 | 11/2007 - 03/2009            |
| NSW/05            | P            | 66                 | 19                 | 14 (37)                                                                 | 10/2007 - 03/2009            |
| VIC/01            | P            | 294                | 136                | 64 (192)                                                                | 02/2008 - 02/2010            |
| VIC/02            | A            | 270                | 130                | 124 (355)                                                               | 06/2008 - 06/2010            |
| VIC/03            | C            | 172                | 88                 | 50 (148)                                                                | 06/2008 - 06/2010            |
| QLD/01            | P            | 265                | 207                | 57 (163)                                                                | 09/2007 - 03/2009            |
| QLD/02            | A            | 211                | 211                | 171 (511)                                                               | 09/2007 - 08/2009            |
| QLD/03            | P            | 93                 | 28                 | 20 (58)                                                                 | 12/2007 - 07/2009            |
| QLD/04            | A            | 56                 | 41                 | 38 (113)                                                                | 11/2007 - 01/2009            |
| QLD/05            | A            | 50                 | 16                 | 15 (44)                                                                 | 10/2007 - 01/2009            |
| QLD/06            | P            | 25                 | 17                 | 5 (15)                                                                  | 12/2007 - 08/2009            |
| SA/01             | A            | 139                | 74                 | 72 (213)                                                                | 02/2008 - 07/2009            |
| SA/02             | P            | 150                | 42                 | 24 (72)                                                                 | 02/2008 - 08/2008            |
| WA/01             | A            | 145                | 102                | 92 (272)                                                                | 01/2008 - 04/2009            |
| TAS/01            | A            | 39                 | 28                 | 25 (75)                                                                 | 11/2007 - 09/2008            |
| Total             |              | 2677               | 1628               | 983 (2887)                                                              | 09/2007 - 06/2010            |

\* Geographic location of each cystic fibrosis (CF) centre by Australian State; NSW, New South Wales;

VIC, Victoria; QLD, Queensland; SA, South Australia; WA, Western Australia; TAS, Tasmania.

† Australian CF centres not included in the study consisted of two paediatric, 1 adult, and 1 combined paediatric and adult centre.

‡ Type of CF Centre; P, Paediatric; A, Adult; C, Combined adult and paediatric.

§ As determined by *Pseudomonas aeruginosa* specific real-time PCR analysis [1].

**Table S2 Comparison of microbiological data with enterobacterial repetitive intergenic consensus (ERIC)-PCR genotype.\*†**

|                                                    | Unique | AUST-01     | AUST-02    | AUST-04 | AUST-05 | AUST-06 |
|----------------------------------------------------|--------|-------------|------------|---------|---------|---------|
| Number of patients                                 | 373    | 220         | 173        | 47      | 37      | 31      |
| Methicillin sensitive <i>Staphylococcus aureus</i> | 25.2   | <b>7.7</b>  | 23.7       | 10.6    | 5.4     | 22.6    |
| Methicillin resistant <i>S. aureus</i>             | 1.3    | 2.7         | 3.5        | 8.5     | -       | -       |
| <i>Haemophilus influenzae</i>                      | 0.5    | 0.5         | 2.3        | -       | 2.7     | -       |
| <i>Burkholderia cepacia complex</i>                | 2.4    | 0.5         | 1.2        | 2.1     | -       | 3.2     |
| <i>Stenotrophomonas maltophilia</i>                | 2.9    | 0.9         | 2.3        | 2.1     | -       | 3.2     |
| <i>Achromobacter xylosoxidans</i>                  | 1.1    | -           | <b>4.6</b> | -       | -       | 3.2     |
| Non-tuberculous <i>Mycobacterium spp.</i>          | 0.3    | -           | -          | -       | -       | -       |
| <i>Aspergillus spp.</i>                            | 12.1   | 5.0         | 6.9        | 12.8    | 2.7     | -       |
| Nil co-pathogens detected                          | 51.7   | <b>69.5</b> | 55.5       | 57.4    | 54.1    | 67.7    |

\* Data expressed as the percentage of patients with co-pathogens reported at the time of sputum specimen collection.

† Chi-square (2 x 2) analysis was used to assess the association between ERIC-PCR genotype and other microorganisms at the time of sample collection. Bold type indicates *P*-values <0.005 for comparison with unique strains.

**Table S3 Comparison of enterobacterial repetitive intergenic consensus (ERIC)-PCR genotype with multilocus sequence type (MLST) sequence type (ST)**

| ERIC-PCR genotype | MLST ST | No. of isolates | ERIC-PCR genotype | MLST ST | No. of isolates | ERIC-PCR genotype | MLST ST | No. of isolates |
|-------------------|---------|-----------------|-------------------|---------|-----------------|-------------------|---------|-----------------|
| AUST-01           | 649     | 15              | AUST-27           | 455     | 2               | U328              | 845     | 1               |
| AUST-02           | 266     | 1               | AUST-28           | 241     | 2               | U329              | 377     | 1               |
| AUST-02           | 775     | 13              | AUST-29           | 261     | 2               | U330              | 11      | 1               |
| AUST-03           | 242     | 5               | AUST-30           | 1036    | 2               | U332              | 806     | 1               |
| AUST-04           | 788     | 3               | AUST-31           | 274     | 2               | U333              | 807     | 1               |
| AUST-05           | 274     | 6               | AUST-32           | 236     | 2               | U334              | 569     | 1               |
| AUST-05           | 781     | 1               | AUST-33           | 12      | 2               | U335              | 796     | 1               |
| AUST-06           | 801     | 4               | AUST-34           | 1038    | 1               | U342              | 12      | 1               |
| AUST-07           | 262     | 3               | AUST-34           | N/A     | 1               | U344              | 798     | 1               |
| AUST-08           | 782     | 3               | AUST-35           | 553     | 2               | U347              | 899     | 1               |
| AUST-08           | 783     | 1               | AUST-36           | 277     | 2               | U348              | 494     | 1               |
| AUST-08           | 784     | 1               | AUST-37           | 155     | 2               | U349              | 282     | 1               |
| AUST-08           | 785     | 1               | AUST-38           | 254     | 1               | U353              | 273     | 1               |
| AUST-09           | 274     | 4               | AUST-38           | 1041    | 1               | U355              | 779     | 1               |
| AUST-09           | 1043    | 1               | U027              | 1035    | 1               | U356              | 780     | 1               |
| AUST-10           | 155     | 2               | U061              | 668     | 1               | U358              | 882     | 1               |
| AUST-10           | 179     | 6               | U108              | 385     | 1               | U359              | 873     | 1               |
| AUST-11           | 803     | 2               | U119              | 1040    | 1               | U360              | 259     | 1               |
| AUST-11           | 1034    | 1               | U280              | 904     | 1               | U365              | 147     | 1               |
| AUST-11           | 1037    | 1               | U281              | 275     | 1               | U366              | 828     | 1               |
| AUST-11           | 508     | 1               | U284              | 399     | 1               | U373              | 27      | 1               |
| AUST-11           | 804     | 1               | U289              | 27      | 1               | U374              | 14      | 1               |
| AUST-11           | 822     | 1               | U290              | 253     | 1               | U375              | 471     | 1               |
| AUST-11           | 882     | 1               | U293              | 274     | 1               | U376              | 15      | 1               |
| AUST-12           | 179     | 3               | U294              | 880     | 1               | U379              | 116     | 1               |
| AUST-13           | 389     | 1               | U296              | 902     | 1               | U380              | 155     | 1               |
| AUST-13           | 800     | 4               | U299              | 821     | 1               | U381              | 847     | 1               |
| AUST-14           | 155     | 2               | U300              | 2       | 1               | U382              | 857     | 1               |
| AUST-14           | 179     | 1               | U301              | 829     | 1               | U387              | 557     | 1               |
| AUST-15           | 17      | 1               | U302              | 910     | 1               | U390              | 905     | 1               |
| AUST-16           | 905     | 3               | U303              | 257     | 1               | U429              | 791     | 1               |
| AUST-17           | 810     | 3               | U304              | 844     | 1               | U433              | 260     | 1               |
| AUST-18           | 274     | 2               | U310              | 905     | 1               | U434              | 1042    | 1               |
| AUST-19           | 155     | 2               | U311              | 245     | 1               | U439              | 795     | 1               |
| AUST-19           | 786     | 1               | U312              | 275     | 1               | U440              | 794     | 1               |
| AUST-20           | 655     | 2               | U313              | 644     | 1               | U444              | 676     | 1               |
| AUST-21           | 808     | 2               | U314              | 851     | 1               | U445              | 793     | 1               |
| AUST-22           | 809     | 2               | U318              | 776     | 1               | U449              | 792     | 1               |
| AUST-23           | 833     | 2               | U321              | 443     | 1               | U484              | 1039    | 1               |
| AUST-24           | 308     | 2               | U322              | 862     | 1               | U488              | 790     | 1               |
| AUST-25           | 274     | 2               | U326              | 270     | 1               | U492              | 146     | 1               |
| AUST-26           | 179     | 2               | U327              | 797     | 1               | U493              | 179     | 1               |

**Table S4 Comparison of multilocus sequence type (MLST) sequence type (ST) with enterobacterial repetitive intergenic consensus (ERIC)-PCR genotype.**

| MLST ST | ERIC-PCR genotype(s) (No. of isolates)                                    |
|---------|---------------------------------------------------------------------------|
| 2       | U300 (1)                                                                  |
| 11      | U330 (1)                                                                  |
| 12      | AUST-33 (2), U342 (1)                                                     |
| 14      | U374 (1)                                                                  |
| 15      | U376 (1)                                                                  |
| 17      | AUST-15 (1)                                                               |
| 27      | U289 (1), U373 (1)                                                        |
| 116     | U379 (1)                                                                  |
| 146     | U492 (1)                                                                  |
| 147     | U365 (U)                                                                  |
| 155     | AUST-10 (2), AUST-14 (2), AUST-19 (2), AUST-37 (2), U380 (1)              |
| 179     | AUST-10 (6), AUST-12 (3), AUST-14 (1), AUST-26 (2), U493 (1)              |
| 236     | AUST-32 (2)                                                               |
| 241     | AUST-28 (2)                                                               |
| 242     | AUST-03 (5)                                                               |
| 245     | U311 (1)                                                                  |
| 253     | U290 (1)                                                                  |
| 254     | AUST-38 (1)                                                               |
| 257     | U303 (1)                                                                  |
| 259     | U360 (1)                                                                  |
| 260     | U433 (1)                                                                  |
| 261     | AUST-29 (2)                                                               |
| 262     | AUST-07 (3)                                                               |
| 266     | AUST-02 (1)                                                               |
| 270     | U326 (1)                                                                  |
| 273     | U353 (1)                                                                  |
| 274     | AUST-05 (6), AUST-09 (4), AUST-18 (2), AUST-25 (2), AUST-31 (2), U293 (1) |
| 275     | U281 (1), U312 (1)                                                        |
| 277     | AUST-36 (2)                                                               |
| 282     | U349 (1)                                                                  |
| 308     | AUST-24 (2)                                                               |
| 377     | U329 (1)                                                                  |
| 385     | U108 (1)                                                                  |
| 389     | AUST-13 (1)                                                               |
| 399     | U284 (1)                                                                  |
| 443     | U321 (1)                                                                  |
| 455     | AUST-27 (2)                                                               |
| 471     | U375 (1)                                                                  |
| 494     | U348 (1)                                                                  |
| 508     | AUST-11 (1)                                                               |
| 553     | AUST-35 (2)                                                               |
| 557     | U387 (1)                                                                  |
| 569     | U334 (1)                                                                  |
| 644     | U313 (1)                                                                  |
| 649     | AUST-01 (15)                                                              |
| 655     | AUST-20 (2)                                                               |
| 668     | U061 (1)                                                                  |
| 676     | U444 (1)                                                                  |
| 775     | AUST-02 (13)                                                              |
| 776     | U318 (1)                                                                  |
| 779     | U355 (1)                                                                  |
| 780     | U356 (1)                                                                  |
| 781     | AUST-05 (1)                                                               |

**Table S4 (continued) Comparison of multilocus sequence type (MLST) sequence type (ST) with enterobacterial repetitive intergenic consensus (ERIC)-PCR genotype**

| MLST ST | ERIC-PCR genotype(s) (No. of isolates) |
|---------|----------------------------------------|
| 782     | AUST-08 (3)                            |
| 783     | AUST-08 (1)                            |
| 784     | AUST-08 (1)                            |
| 785     | AUST-08 (1)                            |
| 786     | AUST-19 (1)                            |
| 788     | AUST-04 (3)                            |
| 790     | U488 (1)                               |
| 791     | U429 (1)                               |
| 792     | U449 (1)                               |
| 793     | U445 (1)                               |
| 794     | U440 (1)                               |
| 795     | U439 (1)                               |
| 796     | U335 (1)                               |
| 797     | U327 (1)                               |
| 798     | U344 (1)                               |
| 800     | AUST-13 (4)                            |
| 801     | AUST-05 (4)                            |
| 803     | AUST-11 (2)                            |
| 804     | AUST-11 (1)                            |
| 806     | U332 (1)                               |
| 807     | U333 (1)                               |
| 808     | AUST-21 (2)                            |
| 809     | AUST-22 (2)                            |
| 810     | AUST-17 (3)                            |
| 821     | U299 (1)                               |
| 822     | AUST-11 (1)                            |
| 828     | U366 (1)                               |
| 829     | U301 (1)                               |
| 833     | AUST-23 (1)                            |
| 834     | AUST-23 (1)                            |
| 844     | U304 (1)                               |
| 845     | U328 (1)                               |
| 847     | U381 (1)                               |
| 851     | U314 (1)                               |
| 857     | U382 (1)                               |
| 862     | U322 (1)                               |
| 873     | U359 (1)                               |
| 880     | U294 (1)                               |
| 882     | AUST-11 (1), U358 (1)                  |
| 899     | U347 (1)                               |
| 902     | U296 (1)                               |
| 904     | U280 (1)                               |
| 905     | AUST-16 (3), U310 (1), U390 (1)        |
| 910     | U302 (1)                               |
| 1034    | AUST-11 (1)                            |
| 1035    | U027 (1)                               |
| 1036    | AUST-30 (2)                            |
| 1037    | AUST-11 (1)                            |
| 1038    | AUST-34 (1)                            |
| 1039    | U484 (1)                               |
| 1040    | U119 (1)                               |
| 1041    | AUST-38 (1)                            |
| 1042    | U434 (1)                               |
| 1043    | AUST-09 (1)                            |
| INDEL01 | AUST-34 (1)                            |

## References

- 1 Anuj SN, Whiley DM, Kidd TJ, et al. Identification of *Pseudomonas aeruginosa* by a duplex real-time polymerase chain reaction assay targeting the *ecfX* and the *gyrB* genes. *Diagn Microbiol Infect Dis* 2009;**63**:127-31.
